# Supplementary material for: Experimental and Simulation Study on Low-Velocity Impact Induced Delamination Damage in CFRP T-shaped Stringer Stiffened Panel
Source: Research Square preprint supplement (doi:10.21203/rs.3.rs-7583091/v1), 2025-09-26
Supplement: Supplementary file 1 [file 6faef99dfb613c26ef174cec.docx]

**Conflict of Interest**

All authors disclosed no relevant relationships.
